# Supplementary material for: Machine Learning Model for Mild Cognitive Impairment Stage Based on Gait and MRI Images
Source: MDPI journal article supplement (doi:10.3390/brainsci14050480), 2024-05-09
Supplement: s1 [file s1]

**Supplement Table S1.** The CNN architecture used for N (=20, 40, or 60) reduced feature dimensions in this study

|   | Layer Type      | Activation Unit | Number of Filters | Kernel Size | Number of Stride | Padding | Output Size | Number of Parameters |
|---|-----------------|-----------------|-------------------|-------------|------------------|---------|-------------|----------------------|
| 1 | Input           |                 |                   |             |                  |         | N X 1       |                      |
| 2 | Conv1D          | Relu            | 64                | 3           | 1                | VALID   | 38 X 64     | 256                  |
| 3 | Conv1D          | Relu            | 64                | 3           | 1                | VALID   | 36 X 64     | 12352                |
| 4 | Dropout (0.5)   |                 |                   |             |                  |         | 36 X 64     | 0                    |
| 5 | MaxPooling1D    | -               | 2                 | -           | -                | -       | 18 X 64     | 0                    |
| 6 | Flatten         |                 |                   |             |                  |         | 1152        | 0                    |
| 7 | Fully connected | Relu            |                   |             |                  |         | 100         | 115300               |
| 8 | Output          | Sigmoid         |                   |             |                  |         | 2           | 202                  |

**Table S2.** Performances of Gait dataset.

| Algorithm for classification | Algorithm for feature reduction | No. of Features | AUC       | ACC       | Recall    | Precision | F1        |
|------------------------------|---------------------------------|-----------------|-----------|-----------|-----------|-----------|-----------|
| <b>SVM</b>                   | <b>ICA</b>                      | <b>20</b>       | 0.61±0.05 | 0.67±0.06 | 0.71±0.07 | 0.93±0.08 | 0.78±0.05 |
|                              |                                 | 40              | 0.61±0.12 | 0.68±0.05 | 0.7±0.07  | 0.93±0.1  | 0.78±0.04 |
|                              |                                 | 60              | 0.51±0.06 | 0.62±0    | 0.64±0.13 | 0.88±0.09 | 0.77±0.02 |
|                              | <b>PCA</b>                      | 20              | 0.69±0.09 | 0.72±0.08 | 0.77±0.08 | 0.99±0.03 | 0.78±0.07 |
|                              |                                 | 40              | 0.65±0.1  | 0.7±0.09  | 0.73±0.07 | 0.99±0.03 | 0.78±0.07 |
|                              |                                 | 60              | 0.65±0.1  | 0.7±0.09  | 0.73±0.07 | 0.99±0.03 | 0.78±0.07 |
|                              | <b>RP</b>                       | 20              | 0.62±0.1  | 0.7±0.07  | 0.7±0.07  | 0.96±0.07 | 0.8±0.04  |
|                              |                                 | 40              | 0.67±0.09 | 0.71±0.09 | 0.76±0.1  | 0.97±0.05 | 0.79±0.05 |
|                              |                                 | 60              | 0.64±0.1  | 0.69±0.09 | 0.73±0.09 | 0.94±0.07 | 0.78±0.03 |
| <b>RF</b>                    | <b>ICA</b>                      | <b>20</b>       | 0.51±0.08 | 0.59±0.08 | 0.63±0.05 | 0.86±0.13 | 0.72±0.07 |
|                              |                                 | 40              | 0.61±0.12 | 0.67±0.1  | 0.7±0.08  | 0.97±0.05 | 0.78±0.04 |
|                              |                                 | 60              | 0.58±0.07 | 0.64±0.07 | 0.68±0.07 | 0.88±0.12 | 0.75±0.06 |
|                              | <b>PCA</b>                      | 20              | 0.65±0.1  | 0.71±0.09 | 0.72±0.08 | 0.92±0.07 | 0.8±0.06  |
|                              |                                 | 40              | 0.65±0.07 | 0.71±0.1  | 0.71±0.08 | 0.95±0.08 | 0.8±0.06  |
|                              |                                 | 60              | 0.55±0.06 | 0.64±0.06 | 0.65±0.04 | 0.97±0.06 | 0.77±0.04 |
|                              | <b>RP</b>                       | 20              | 0.64±0.1  | 0.69±0.08 | 0.73±0.09 | 0.83±0.13 | 0.77±0.06 |
|                              |                                 | 40              | 0.62±0.11 | 0.67±0.09 | 0.72±0.09 | 0.82±0.14 | 0.75±0.08 |
|                              |                                 | 60              | 0.69±0.1  | 0.72±0.09 | 0.76±0.08 | 0.86±0.1  | 0.8±0.06  |
| <b>CNN</b>                   | <b>ICA</b>                      | 20              | 0.84±0.17 | 0.86±0.16 | 0.88±0.14 | 0.92±0.11 | 0.9±0.11  |

|            |    |           |           |           |           |           |
|------------|----|-----------|-----------|-----------|-----------|-----------|
| <b>PCA</b> | 40 | 0.95±0.09 | 0.97±0.08 | 0.97±0.08 | 0.99±0.03 | 0.98±0.05 |
|            | 60 | 0.85±0.18 | 0.87±0.16 | 0.9±0.14  | 0.9±0.11  | 0.9±0.12  |
|            | 20 | 0.91±0.13 | 0.93±0.12 | 0.93±0.11 | 0.99±0.03 | 0.95±0.09 |
|            | 40 | 0.93±0.12 | 0.95±0.1  | 0.94±0.1  | 0.99±0.03 | 0.96±0.07 |
|            | 60 | 0.94±0.11 | 0.96±0.09 | 0.95±0.09 | 0.99±0.03 | 0.97±0.06 |
|            | 20 | 0.95±0.09 | 0.96±0.08 | 0.96±0.09 | 0.99±0.03 | 0.97±0.06 |
|            | 40 | 0.98±0.04 | 0.99±0.04 | 0.99±0.03 | 0.99±0.03 | 0.99±0.04 |
|            | 60 | 0.94±0.1  | 0.95±0.1  | 0.96±0.08 | 0.97±0.06 | 0.96±0.08 |
|            | 40 | 0.93±0.12 | 0.95±0.1  | 0.94±0.1  | 0.99±0.03 | 0.96±0.07 |
|            | 60 | 0.94±0.11 | 0.96±0.09 | 0.95±0.09 | 0.99±0.03 | 0.97±0.06 |
|            | 20 | 0.91±0.13 | 0.93±0.12 | 0.93±0.11 | 0.99±0.03 | 0.95±0.09 |
|            | 60 | 0.85±0.18 | 0.87±0.16 | 0.9±0.14  | 0.9±0.11  | 0.9±0.12  |

**Table S3.** Performances of MRI dataset.

| Algorithm for classification | Algorithm for feature reduction | No. of Features | AUC       | ACC       | Recall    | Precision | F1        |
|------------------------------|---------------------------------|-----------------|-----------|-----------|-----------|-----------|-----------|
| <b>SVM</b>                   | <b>ICA</b>                      | 20              | 0.62±0.1  | 0.65±0.1  | 0.72±0.11 | 0.99±0.03 | 0.77±0.01 |
|                              |                                 | 40              | 0.59±0.08 | 0.64±0.08 | 0.71±0.09 | 0.95±0.05 | 0.77±0.01 |
|                              |                                 | 60              | 0.5±0.12  | 0.62±0    | 0.62±0.11 | 0.87±0.1  | 0.77±0.01 |
|                              | <b>PCA</b>                      | 20              | 0.64±0.1  | 0.67±0.09 | 0.74±0.08 | 0.99±0.03 | 0.77±0.01 |
|                              |                                 | 40              | 0.64±0.1  | 0.67±0.1  | 0.74±0.1  | 0.97±0.05 | 0.77±0.01 |
|                              |                                 | 60              | 0.61±0.09 | 0.66±0.09 | 0.7±0.09  | 0.98±0.04 | 0.77±0.02 |
|                              | <b>RP</b>                       | 20              | 0.53±0.09 | 0.62±0    | 0.65±0.09 | 0.98±0.06 | 0.77±0.02 |
|                              |                                 | 40              | 0.64±0.1  | 0.66±0.1  | 0.75±0.09 | 0.97±0.05 | 0.77±0.02 |
|                              |                                 | 60              | 0.61±0.12 | 0.66±0.09 | 0.71±0.1  | 0.99±0.03 | 0.77±0.03 |
| <b>RF</b>                    | <b>ICA</b>                      | <b>20</b>       | 0.56±0.08 | 0.63±0.07 | 0.67±0.05 | 0.85±0.12 | 0.73±0.07 |
|                              |                                 | 40              | 0.55±0.1  | 0.64±0.07 | 0.66±0.06 | 0.92±0.07 | 0.76±0.05 |
|                              |                                 | 60              | 0.54±0.08 | 0.63±0.06 | 0.65±0.05 | 0.92±0.09 | 0.75±0.04 |
|                              | <b>PCA</b>                      | 20              | 0.53±0.1  | 0.6±0.08  | 0.65±0.07 | 0.82±0.14 | 0.71±0.07 |
|                              |                                 | 40              | 0.59±0.05 | 0.67±0.05 | 0.68±0.04 | 0.93±0.1  | 0.78±0.03 |
|                              |                                 | 60              | 0.51±0.07 | 0.62±0.06 | 0.63±0.04 | 0.98±0.04 | 0.77±0.02 |
|                              | <b>RP</b>                       | 20              | 0.57±0.09 | 0.64±0.1  | 0.66±0.06 | 0.84±0.14 | 0.74±0.08 |
|                              |                                 | 40              | 0.56±0.09 | 0.62±0.08 | 0.67±0.06 | 0.81±0.14 | 0.73±0.06 |
|                              |                                 | 60              | 0.59±0.14 | 0.64±0.11 | 0.7±0.12  | 0.83±0.13 | 0.74±0.08 |
| <b>CNN</b>                   | <b>ICA</b>                      | 20              | 0.84±0.13 | 0.84±0.13 | 0.91±0.1  | 0.83±0.14 | 0.86±0.12 |

|            |    |           |           |           |           |           |
|------------|----|-----------|-----------|-----------|-----------|-----------|
| <b>PCA</b> | 40 | 0.9±0.1   | 0.92±0.07 | 0.93±0.1  | 0.96±0.05 | 0.94±0.05 |
|            | 60 | 0.84±0.21 | 0.86±0.19 | 0.88±0.17 | 0.94±0.12 | 0.9±0.14  |
|            | 20 | 0.94±0.1  | 0.96±0.08 | 0.95±0.09 | 0.99±0.03 | 0.97±0.05 |
|            | 40 | 0.93±0.13 | 0.94±0.12 | 0.95±0.1  | 0.97±0.06 | 0.96±0.08 |
|            | 60 | 0.93±0.13 | 0.94±0.11 | 0.95±0.11 | 0.98±0.04 | 0.96±0.08 |
|            | 20 | 0.91±0.16 | 0.92±0.17 | 0.93±0.14 | 0.96±0.09 | 0.95±0.1  |
|            | 40 | 0.9±0.14  | 0.92±0.12 | 0.92±0.12 | 0.98±0.04 | 0.95±0.08 |
|            | 60 | 0.93±0.12 | 0.95±0.1  | 0.94±0.11 | 0.99±0.03 | 0.96±0.07 |
|            |    |           |           |           |           |           |
|            |    |           |           |           |           |           |
|            |    |           |           |           |           |           |
|            |    |           |           |           |           |           |

**Table S4.** Performances of Gait + MRI dataset.

| Algorithm for classification | Algorithm for feature reduction | No. of Features | AUC       | ACC       | Recall    | Precision | F1        |
|------------------------------|---------------------------------|-----------------|-----------|-----------|-----------|-----------|-----------|
| SVM                          | ICA                             | 20              | 0.65±0.1  | 0.68±0.1  | 0.75±0.1  | 0.84±0.11 | 0.77±0.03 |
|                              |                                 | 40              | 0.59±0.09 | 0.64±0.09 | 0.69±0.08 | 0.95±0.05 | 0.77±0.03 |
|                              |                                 | 60              | 0.5±0     | 0.62±0    | 0.62±0.11 | 0.84±0.1  | 0.77±0    |
|                              | PCA                             | 20              | 0.66±0.1  | 0.68±0.1  | 0.78±0.09 | 0.99±0.03 | 0.77±0.01 |
|                              |                                 | 40              | 0.64±0.09 | 0.66±0.1  | 0.75±0.09 | 0.94±0.09 | 0.77±0.01 |
|                              |                                 | 60              | 0.61±0.08 | 0.64±0.08 | 0.71±0.08 | 0.97±0.05 | 0.77±0.01 |
|                              | RP                              | 20              | 0.61±0.15 | 0.62±0.14 | 0.72±0.14 | 0.94±0.1  | 0.77±0.02 |
|                              |                                 | 40              | 0.65±0.14 | 0.68±0.14 | 0.73±0.11 | 0.99±0.03 | 0.77±0.01 |
|                              |                                 | 60              | 0.61±0.08 | 0.67±0.03 | 0.72±0.07 | 0.96±0.07 | 0.78±0.02 |
| RF                           | ICA                             | 20              | 0.57±0.11 | 0.62±0.12 | 0.67±0.07 | 0.86±0.07 | 0.74±0.04 |
|                              |                                 | 40              | 0.51±0.11 | 0.59±0.1  | 0.63±0.07 | 0.86±0.17 | 0.72±0.1  |
|                              |                                 | 60              | 0.5±0.05  | 0.59±0.06 | 0.63±0.03 | 0.84±0.16 | 0.71±0.08 |
|                              | PCA                             | 20              | 0.62±0.06 | 0.68±0.08 | 0.7±0.05  | 0.88±0.12 | 0.77±0.07 |
|                              |                                 | 40              | 0.6±0.08  | 0.66±0.08 | 0.68±0.04 | 0.92±0.06 | 0.77±0.04 |
|                              |                                 | 60              | 0.56±0.07 | 0.65±0.06 | 0.66±0.05 | 0.96±0.05 | 0.77±0.05 |
|                              | RP                              | 20              | 0.54±0.1  | 0.62±0.1  | 0.65±0.06 | 0.85±0.14 | 0.73±0.09 |
|                              |                                 | 40              | 0.57±0.11 | 0.64±0.1  | 0.67±0.08 | 0.86±0.08 | 0.75±0.06 |
|                              |                                 | 60              | 0.61±0.1  | 0.66±0.11 | 0.69±0.06 | 0.86±0.11 | 0.75±0.09 |
| CNN                          | ICA                             | 20              | 0.86±0.17 | 0.89±0.16 | 0.89±0.14 | 0.96±0.05 | 0.92±0.11 |

|     |     |    |           |           |           |           |           |
|-----|-----|----|-----------|-----------|-----------|-----------|-----------|
| PCA | PCA | 40 | 0.87±0.15 | 0.88±0.13 | 0.93±0.13 | 0.91±0.08 | 0.91±0.09 |
|     |     | 60 | 0.9±0.14  | 0.91±0.13 | 0.94±0.11 | 0.91±0.1  | 0.92±0.1  |
|     |     | 20 | 0.9±0.12  | 0.91±0.12 | 0.94±0.09 | 0.93±0.06 | 0.93±0.1  |
|     |     | 40 | 0.93±0.11 | 0.94±0.11 | 0.95±0.09 | 0.96±0.09 | 0.95±0.09 |
|     |     | 60 | 0.93±0.11 | 0.94±0.11 | 0.95±0.09 | 0.97±0.05 | 0.95±0.09 |
|     |     | 20 | 0.93±0.12 | 0.95±0.1  | 0.94±0.11 | 0.99±0.03 | 0.96±0.07 |
|     | RP  | 40 | 0.92±0.15 | 0.94±0.12 | 0.94±0.14 | 0.99±0.03 | 0.96±0.08 |
|     |     | 60 | 0.94±0.1  | 0.95±0.1  | 0.95±0.08 | 0.98±0.04 | 0.96±0.07 |
|     |     | 40 | 0.92±0.15 | 0.94±0.12 | 0.94±0.14 | 0.99±0.03 | 0.96±0.08 |
|     |     | 60 | 0.94±0.1  | 0.95±0.1  | 0.95±0.08 | 0.98±0.04 | 0.96±0.07 |
|     |     | 40 | 0.92±0.15 | 0.94±0.12 | 0.94±0.14 | 0.99±0.03 | 0.96±0.08 |
|     |     | 60 | 0.94±0.1  | 0.95±0.1  | 0.95±0.08 | 0.98±0.04 | 0.96±0.07 |
